# Supplementary material for: Raman hyperspectroscopy of saliva and machine learning for Sjögren’s disease diagnostics
Source: PubMed Central journal article supplement (PMC11096345; doi:10.1038/s41598-024-59850-6), 2024-05-15
Supplement: 41598_2024_59850_MOESM1_ESM.pdf [file 41598_2024_59850_MOESM1_ESM.pdf]

**Supplementary Information**

**Raman hyperspectroscopy of saliva and machine learning for Sjögren's Syndrome diagnostics**

Bhavik Vyas<sup>1</sup>, Ana Khatiaashvili<sup>2</sup>, Lisa Galati<sup>2</sup>, Khoa Ngo<sup>2</sup>, Neil Gildener-Leapman<sup>2</sup>, Melinda Larsen<sup>3</sup> and Igor K. Lednev<sup>1,3\*</sup>

<sup>1</sup>Department of Chemistry, University at Albany, SUNY, Albany, NY 12222

<sup>2</sup>Division of Otolaryngology Head and Neck Surgery, Albany Medical College, Albany NY 12208

<sup>3</sup>Department of Biology and The RNA Institute, University at Albany, SUNY, Albany, NY 12222

\*Corresponding Author: [ilednev@albany.edu](mailto:ilednev@albany.edu)

Fig S1. Outlier removal using Hotelling T<sup>2</sup>. The spectra with the T<sup>2</sup> Hotelling values exceeding reduced statistical threshold (--) considered outliers (Grey area top right)

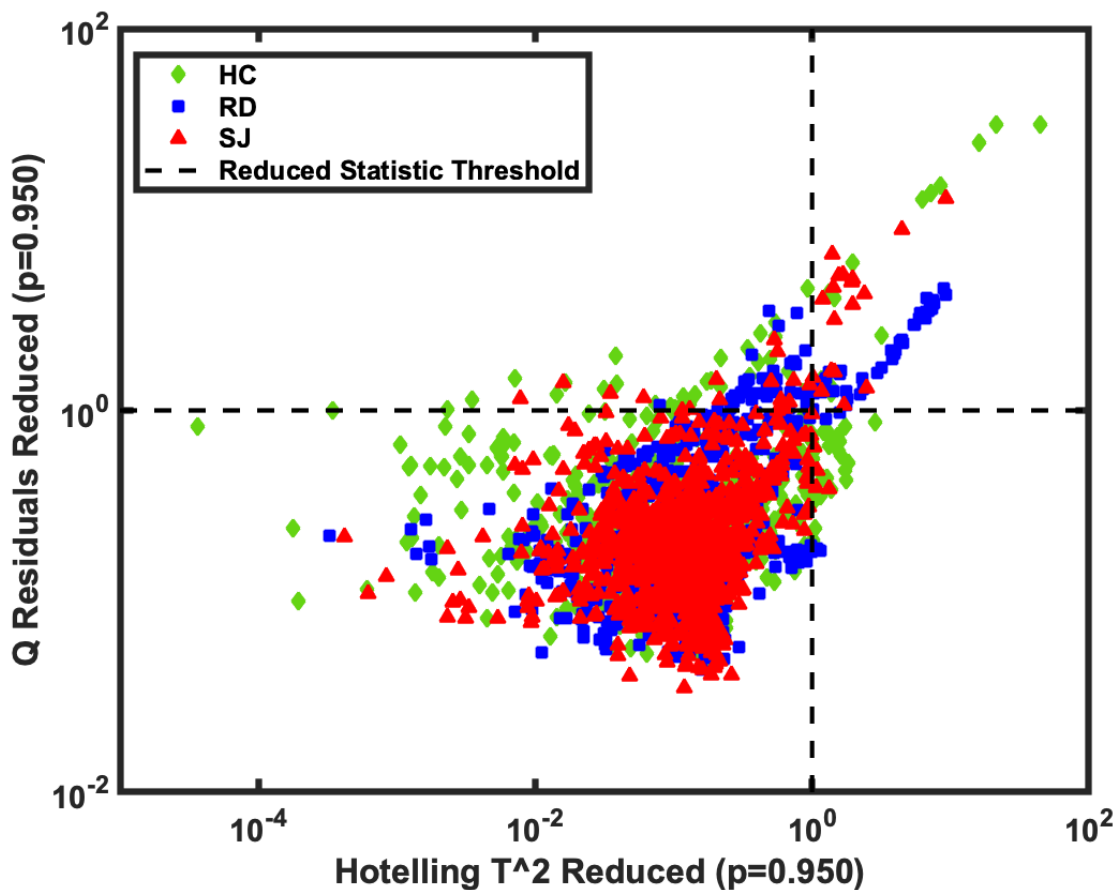

Table S1A. Confusion matrix of the external validation at the spectral level

| Predicted Class | Actual Class |    |    |
|-----------------|--------------|----|----|
|                 | HC           | RD | SJ |
| HC              | 74           | 4  | 19 |
| RD              | 5            | 70 | 1  |
| SJ              | 20           | 7  | 65 |

Table S1B. Classification predictions for individual spectra collected for each of the nine samples used for external validation.

| True class | Predicted class |    |     |
|------------|-----------------|----|-----|
|            | HC              | RD | SjD |
| HC-1       | 32              | 3  | 1   |
| HC-2       | 20              | 1  | 11  |
| HC-3       | 22              | 1  | 8   |
| RD-1       | 4               | 21 | 2   |
| RD-2       | 0               | 19 | 4   |
| RD-3       | 0               | 30 | 1   |
| SjD-1      | 6               | 1  | 11  |
| SjD-2      | 0               | 0  | 37  |
| SjD-3      | 13              | 0  | 17  |
